# Supplementary material for: The effect of prone positioning on mortality in patients with acute respiratory distress syndrome: a meta-analysis of randomized controlled trials
Source: Crit Care. 2014 May 28;18(3):R109. doi: 10.1186/cc13896 (PMC4075407; doi:10.1186/cc13896)
Supplement: Additional file 3: Figure S7 — Meta-analysis of the effect of PP on 60-day mortality in ARDS patients with P/F ≤300 mmHg. [file cc13896-S3.pdf]

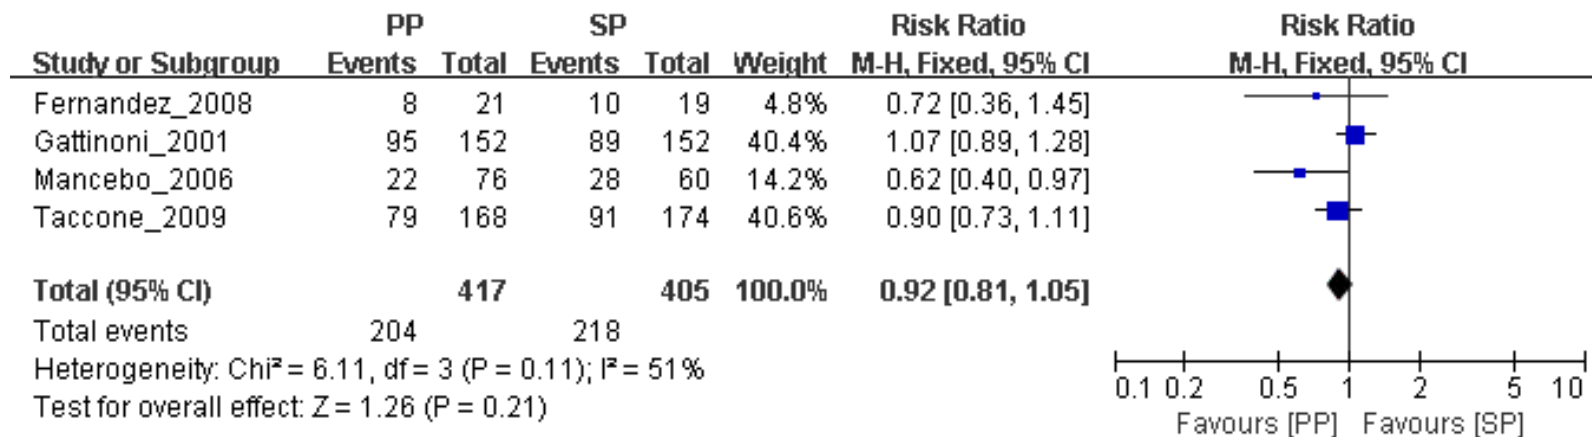

**Figure S7** Meta-analysis of the effect of PP on 60-day mortality in ARDS patients with  $P/F \leq 300\text{mmHg}$ . The  $I^2$  test shows that  $I^2$  ( $I^2 = 51\%$ ) is around 50%. However, the M-H chi-square test ( $p = 0.11$ ) showed no obvious heterogeneity. Hence, fixed-effects model was performed. The z test for overall effects was not statistically significant ( $p = 0.21$ ). Weight is the contribution of each study to the overall RR. PP, prone positioning; SP, supine prone; ARDS, acute respiratory distress syndrome; P/F, partial pressure of arterial oxygen/inspired fraction of oxygen; M-H, Mantel-Haenzel;  $I^2$ , percentage of total variation across studies from between-study heterogeneity rather than chance; RR, risk ratio; CI, confidence interval .
