# Supplementary material for: The effect of prone positioning on mortality in patients with acute respiratory distress syndrome: a meta-analysis of randomized controlled trials
Source: PubMed Central journal article supplement (PMC4075407; doi:10.1186/cc13896), 2014-05-28
Supplement: cc13896-S2.pdf [file cc13896-S2.pdf]

**Table S2** Methodology quality assessment

| <b>Trial</b>         | <b>Randomization</b> | <b>Blinding</b> | <b>Handling of<br/>withdrawals and<br/>dropouts</b> | <b>Jadad score</b> | <b>Allocation<br/>concealment</b> | <b>Crossover</b> |
|----------------------|----------------------|-----------------|-----------------------------------------------------|--------------------|-----------------------------------|------------------|
| Gattinoni2001(9)     | 2                    | 0               | 1                                                   | 3                  | adequate                          | YES              |
| Guerin2004(10)       | 2                    | 0               | 1                                                   | 3                  | adequate                          | YES              |
| Voggenreiter2005(18) | 2                    | 0               | 1                                                   | 3                  | adequate                          | NO               |
| Curley2005(17)       | 2                    | 0               | 1                                                   | 3                  | adequate                          | YES              |
| Mancebo2006(22)      | 2                    | 0               | 1                                                   | 3                  | adequate                          | YES              |
| Chan2007(19)         | 2                    | 0               | 1                                                   | 3                  | not used                          | NO               |
| Fernandez2008(20)    | 2                    | 0               | 1                                                   | 3                  | adequate                          | YES              |
| Taccone2009(25)      | 2                    | 0               | 1                                                   | 3                  | adequate                          | YES              |
| Gu érin2013(14)      | 2                    | 0               | 1                                                   | 3                  | adequate                          | YES              |
