# Supplementary material for: The effect of prone positioning on mortality in patients with acute respiratory distress syndrome: a meta-analysis of randomized controlled trials
Source: PubMed Central journal article supplement (PMC4075407; doi:10.1186/cc13896), 2014-05-28
Supplement: cc13896-S4.pdf [file cc13896-S4.pdf]

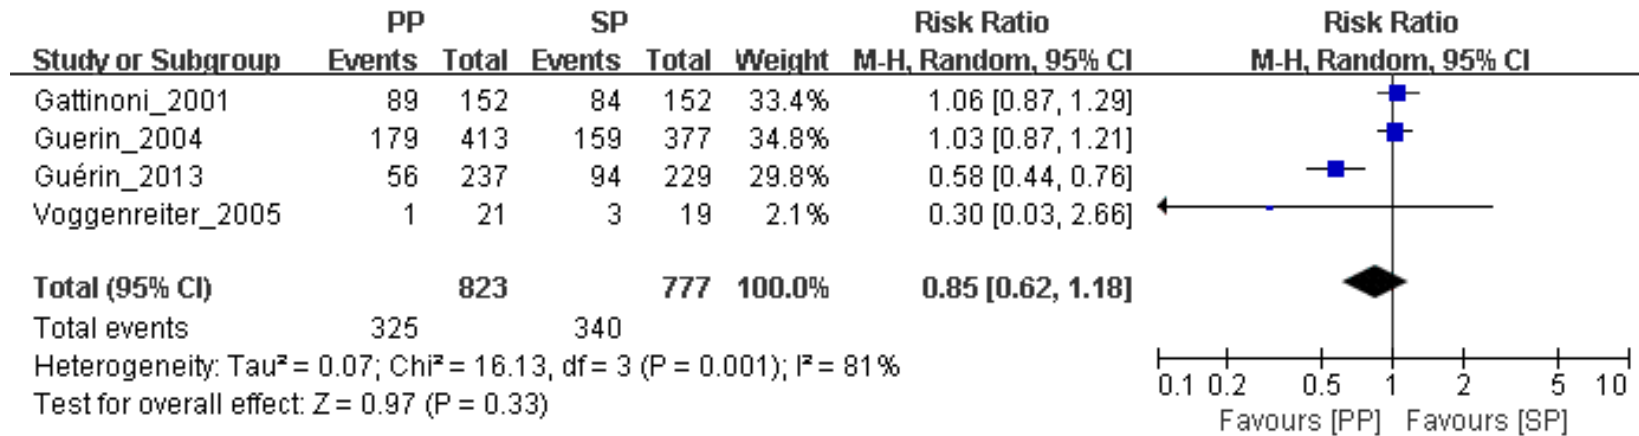

**Figure S8** Meta-analysis of the effect of PP on 90-day mortality in ARDS patients with P/F  $\leq$  300 mm Hg. Evidence showed obvious heterogeneity using the M-H chi-square test ( $p = 0.001$ ) and the  $I^2$  test ( $I^2 = 81\%$ ). Random-effects model was performed. The z test for overall effects was not statistically significant ( $p = 0.33$ ). Weight is the contribution of each study to the overall RR. PP, prone positioning; SP, supine prone; ARDS, acute respiratory distress syndrome; P/F, partial pressure of arterial oxygen/inspired fraction of oxygen; M-H, Mantel-Haenzel;  $I^2$ , percentage of total variation across studies from between-study heterogeneity rather than chance; RR, risk ratio; CI, confidence interval.
